# Supplementary material for: Talin Is Required Continuously for Cardiomyocyte Remodeling during Heart Growth in Drosophila
Source: PubMed Central journal article supplement (PMC4482443; doi:10.1371/journal.pone.0131238), 2015-06-25
Supplement: pone.0131238.s004.pdf [file pone.0131238.s004.pdf]

**Supporting Table S2.**

**Phenotypes associated with Talin depletion at different stages.**

| Depletion during:   | midline zone<br>“intercalated disc” |                          | medial<br>orientation<br>of myofibril | Contraction<br>Ratio | Rhythmicity     | Heart<br>Rate,<br><i>Hz</i> |
|---------------------|-------------------------------------|--------------------------|---------------------------------------|----------------------|-----------------|-----------------------------|
|                     | alignment                           | midline<br>gap           |                                       |                      |                 |                             |
| <b>Control</b>      | linear                              | < 5 $\mu\text{m}$        | yes                                   | 7.58 $\pm$ 2.08      | 0.69 $\pm$ 0.08 | 3.69 $\pm$ 0.45             |
| <b>L1</b>           | absent                              | 10 - 50<br>$\mu\text{m}$ | no                                    | 1.71 $\pm$ 1.01      | 0.45 $\pm$ .020 | 4.56 $\pm$ 0.67             |
| <b>L2,3</b>         | jagged                              | 3 - 8 $\mu\text{m}$      | yes                                   | 3.84 $\pm$ 1.47      | 0.38 $\pm$ .023 | 3.61 $\pm$ 0.75             |
| <b>L1,2,3,Pupal</b> | jagged <i>or</i><br>absent          | 5 - 20 $\mu\text{m}$     | no                                    | <i>n.d.</i>          | <i>n.d.</i>     | <i>n.d.</i>                 |
| <b>Pupal</b>        | jagged <i>or</i><br>absent          | 5- 50 $\mu\text{m}$      | no                                    | <i>n.d.</i>          | <i>n.d.</i>     | <i>n.d.</i>                 |
| <b>Adult (6 wk)</b> | linear                              | < 5 $\mu\text{m}$        | yes                                   | <i>n.d.</i>          | <i>n.d.</i>     | <i>n.d.</i>                 |
